# Supplementary material for: Content, Mechanism, and Outcome of Effective Telehealth Solutions for Management of Chronic Obstructive Pulmonary Diseases: A Narrative Review
Source: MDPI journal article supplement (doi:10.3390/healthcare11243164), 2023-12-14

Supplementary file 1. Search strategy example from PubMed up to October 2023.

| Search number | Query          | Search Details                                                                                                                                                                                                                                                                                                                                                                                                                                                                                                                                                                                                              | Results |
|---------------|----------------|-----------------------------------------------------------------------------------------------------------------------------------------------------------------------------------------------------------------------------------------------------------------------------------------------------------------------------------------------------------------------------------------------------------------------------------------------------------------------------------------------------------------------------------------------------------------------------------------------------------------------------|---------|
| 1             | telehealth     | "telehealth s"[All Fields] OR<br>"telemedicine"[MeSH Terms] OR<br>"telemedicine"[All Fields] OR "telehealth"[All Fields]                                                                                                                                                                                                                                                                                                                                                                                                                                                                                                    | 64,533  |
| 2             | digital health | "mayo clin proc digit health"[Journal] OR<br>"lancet digit health"[Journal] OR "eur heart j digit health"[Journal] OR "digit health"[Journal] OR ("digital"[All Fields] AND "health"[All Fields]) OR "digital health"[All Fields]                                                                                                                                                                                                                                                                                                                                                                                           | 66,692  |
| 3             | #1 or #2       | "telehealth s"[All Fields] OR<br>"telemedicine"[MeSH Terms] OR<br>"telemedicine"[All Fields] OR "telehealth"[All Fields] OR ("mayo clin proc digit health"[Journal] OR "lancet digit health"[Journal] OR "eur heart j digit health"[Journal] OR "digit health"[Journal] OR ("digital"[All Fields] AND "health"[All Fields]) OR "digital health"[All Fields])                                                                                                                                                                                                                                                                | 124,937 |
| 4             | COPD           | "pulmonary disease, chronic obstructive"[MeSH Terms] OR<br>("pulmonary"[All Fields] AND "disease"[All Fields] AND "chronic"[All Fields] AND "obstructive"[All Fields]) OR "chronic obstructive pulmonary disease"[All Fields] OR "copd"[All Fields]                                                                                                                                                                                                                                                                                                                                                                         | 108,260 |
| 5             | #3 and #4      | ("telehealth s"[All Fields] OR<br>"telemedicine"[MeSH Terms] OR<br>"telemedicine"[All Fields] OR "telehealth"[All Fields] OR ("mayo clin proc digit health"[Journal] OR "lancet digit health"[Journal] OR "eur heart j digit health"[Journal] OR "digit health"[Journal] OR ("digital"[All Fields] AND "health"[All Fields]) OR "digital health"[All Fields])) AND<br>("pulmonary disease, chronic obstructive"[MeSH Terms] OR<br>("pulmonary"[All Fields] AND "disease"[All Fields] AND "chronic"[All Fields] AND "obstructive"[All Fields]) OR "chronic obstructive pulmonary disease"[All Fields] OR "copd"[All Fields]) | 1,190   |
| 6             | #3 and #4      | ((("telehealth s"[All Fields] OR<br>"telemedicine"[MeSH Terms] OR<br>"telemedicine"[All Fields] OR "telehealth"[All Fields] OR ("mayo clin proc digit                                                                                                                                                                                                                                                                                                                                                                                                                                                                       | 184     |

|  |  |                                                                                                                                                                                                                                                                                                                                                                                                                                                                                                                                 |  |
|--|--|---------------------------------------------------------------------------------------------------------------------------------------------------------------------------------------------------------------------------------------------------------------------------------------------------------------------------------------------------------------------------------------------------------------------------------------------------------------------------------------------------------------------------------|--|
|  |  | health"[Journal] OR "lancet digit<br>health"[Journal] OR "eur heart j digit<br>health"[Journal] OR "digit health"[Journal] OR<br>("digital"[All Fields] AND "health"[All Fields])<br>OR "digital health"[All Fields])) AND<br>("pulmonary disease, chronic<br>obstructive"[MeSH Terms] OR<br>("pulmonary"[All Fields] AND "disease"[All<br>Fields] AND "chronic"[All Fields] AND<br>"obstructive"[All Fields]) OR "chronic<br>obstructive pulmonary disease"[All Fields] OR<br>"copd"[All Fields])) AND (clinicaltrial[Filter]) |  |
|--|--|---------------------------------------------------------------------------------------------------------------------------------------------------------------------------------------------------------------------------------------------------------------------------------------------------------------------------------------------------------------------------------------------------------------------------------------------------------------------------------------------------------------------------------|--|

Supplementary file 2. Number of published clinical trials per year up to October 2023.

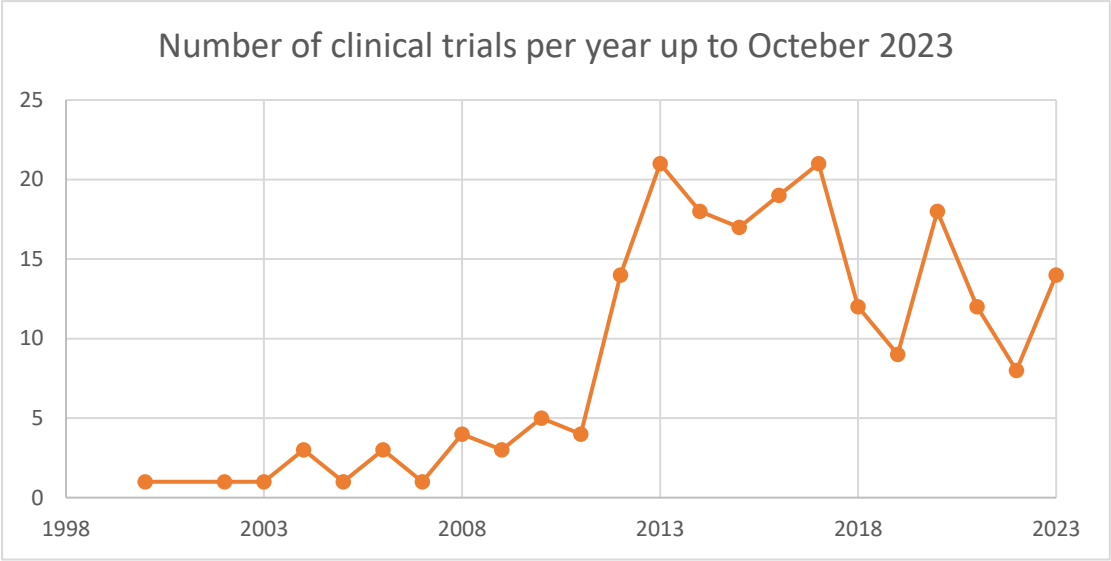

Supplement: s1 [file s1]
